# Supplementary material for: A novel RNA aptamer identifies plasma membrane ATP synthase beta subunit as an early marker and therapeutic target in aggressive cancer
Source: Springer Nature journal article supplement (doi:10.1007/s10549-019-05174-3), 2019-04-20

Novel RNA aptamer identifies plasma membrane ATP synthase beta subunit as an early marker and therapeutic target in aggressive cancer

Speransky S<sup>1</sup>, Serafini P<sup>2</sup>, Caroli J<sup>3</sup>, Bicciato S<sup>3</sup>, Lippman ME<sup>1,4</sup>, Bishopric NH<sup>1,4</sup>

<sup>1</sup> Departments of Medicine and <sup>2</sup> Microbiology & Immunology, Sylvester Comprehensive Cancer Center, University of Miami Miller School of Medicine, Miami, USA

<sup>3</sup> Center for Genome Research, Department of Life Sciences, University of Modena and Reggio Emilia, Modena, Italy

<sup>4</sup> Department of Oncology, Georgetown Lombardi Comprehensive Cancer Center, Georgetown University, Washington DC, USA

Corresponding Author

Nanette H. Bishopric, MD

Email: nhb20@georgetown.edu

**Supplemental Materials Table of Contents:**

|                                               | page |
|-----------------------------------------------|------|
| Online Resource 1.....                        | 1    |
| Online Resource 2 (Supplemental Methods)..... | 2-3  |
| Online Resource 3.....                        | 4-10 |
| Online Resource 4.....                        | 11   |
| Online Resource 5.....                        | 11   |

**Online Resource 1. cDNA oligomer sequences of 5 aptamer candidates used for T7 in vitro transcription**

| aptamer | oligomer sequence                                                                                                                                    |
|---------|------------------------------------------------------------------------------------------------------------------------------------------------------|
| Apt413  | 5'-GGG GGA ATT CTA ATA CGA CTC ACT ATA GGG AGG ACG ATG CGG ATT ACC AAC TCG AAC GCC GAG AGTGTG GTC ACG TGT TCT GCA GAC GAC TCG CTG AGG ATC CGA GA-3'  |
| Apt63   | 5'-GGG GGA ATT CTA ATA CGA CTC ACT ATA GGG AGG ACG ATG CGG GGA AGC AAC ACT TAG TCG CGA TTG ATA CGT GCG CAG TCA TCA GAC GAC TCG CTG AGG ATC CGA GA-3' |
| Apt 41  | 5'-GGG GGA ATT CTA ATA CGA CTC ACT ATA GGG AGG ACG ATG CGG ACG GAG GAT AGT TGC TAA TCG AGC GCT GCC GAC GCT CCA GAC GAC TCG CTG AGG ATC CGA GA-3'     |
| Apt 132 | 5'-GGG GGA ATT CTA ATA CGA CTC ACT ATA GGG AGG ACG ATG CGG TCT CGA CTT TCC ACA CGC GTG TTC TTCGTC TGA TCT GGC CCA GAC GAC TCG CTG AGG ATC CGA GA-3'  |
| Apt 521 | 5'-GGG GGA ATT CTA ATA CGA CTC ACT ATA GGG AGG ACG ATG CGG CCC ATC ACT CCC GCG TAT TGC GAA CGC ATC GTT ATT TAG CCA GAC GAC TCG CTG AGG ATC CGA GA-3' |
| Scr     | 5'-GGG GGA ATT CTA ATA CGA CTC ACT ATA GGG AGG ACG ATG CGG GGA AGC AAC ACT TAG TCG GTT AAA GCA ACA CTT AGC CAC CCA GAC GAC TCG CTG AGG ATC CGA GA-3' |

## Online Resource 2 (Supplemental Methods)

### In vitro aptamer binding affinity and cytotoxicity assays

Two independent assays were carried out to evaluate Apt63 cytotoxicity in vitro: **(1)** direct visualization of Apt 63 cytotoxicity was performed in the IncuCyte® S3 Live-Cell Analysis System. LN3 and Pro 5 cells were seeded at  $1 \times 10^3$  cells per well in 24-well, black-walled, clear-bottomed tissue culture plates (Corning, Corning, NY) in 300  $\mu$ l complete growth medium. Cells were allowed to grow for 24 hours. Cells were then treated with 1 nM of unlabeled Apt63, AptScr and 5 nM of SYTOX™ Green. The time-lapse video was recorded every 5 min for 1h 40min post aptamer treatment. **(2)** Apt63 cytotoxicity was evaluated by SYTOX™ Green uptake. PC3, PC3ML, RWPE, MDA-MB-23, MDA-MB-436, MCF7, MCF10A, T41, NR 67, LN3, Pro5 cell lines were seeded in 96-well, black-walled, clear-bottomed tissue culture plates (Corning, Corning, NY) in 100  $\mu$ l complete growth medium. The number of seeded cells per well was experimentally determined for each cell line to be 60-70% confluent in 24 hours for all tested cultures. Cells were treated with 1 nM of unlabeled Apt63 and 5nM of SYTOX™ Green and endpoint readings were performed at 3 hours post aptamer treatment by recording SYTOX™ Green fluorescence. Readings were normalized to untreated cells and plotted using Excel.

Binding affinity of Apt63 to its membrane target was measured using the CellTiter-Glo® luminescent assay (Promega, Madison, WI). LN3 cells were seeded at  $4 \times 10^3$  cells per well in 96-well, black-walled, clear-bottomed tissue culture plates (Corning, Corning, NY) in 100  $\mu$ l complete growth medium and allowed to grow for 24 hours. For the experiment cells were treated in triplicate with unlabeled Apt63 at different concentrations (0.35 nM, 0.7 nM, 1nM, 1.4 nM, 2.3 nM, 7.0 nM, 10 nM, 15 nM). CellTiter-Glo® reagent was added to the wells at 1:1 vol/vol ratio as recommended by manufacturer and endpoint readings were performed at 60 min post aptamer treatment. The raw relative luminescence units (RLUs) from the plate reader were normalized to nontreated cells and plotted using GraphPad Prism 8 Software.

Both, luminescent and fluorescent readings were obtained using EnVision™ (PerkinElmer, USA) plate reader.

### Mouse xenograft models and aptamer cytotoxicity in vivo

For visualization of Apt63 uptake and retain by xenograft tumor 14 male NOD.CB17-Prkdcscid/J mice (10 weeks old) were injected orthotopically into the right anterior lobe of the prostate with  $2 \times 10^6$  LNCapLN3 and  $2 \times 10^6$  LNCapPro5 cells. Each mouse received one type of cells. When xenograft tumors reach a palpable/visual size, each mouse received single tail vein injection with 1nmol of Alexa Fluor™ 647 labeled Apt63 and AptScr in 200  $\mu$ l of PBS, 3 mice per each treatment. One mouse was injected with PBS only to establish auto fluorescence baseline. Live imaging of Alexa Fluor™ 647 labeled Apt63, and AptScr uptake was recorded in vivo on Xenogen IVIS-200 imaging system immediately after completed injections of all mice in the groups. Mice were re-imaged 3 hours post injection to record retention of labeled Apt63 and Apt Scr. Mouse IVIS imaging was performed by IUCAC approved standard procedure, were each mouse anesthetized by vaporized 2% isoflurane during imaging. After first imaging session mice were returned into resting cage and re-anesthetized for re-imaging. Mice were sacrificed after the last imaging session; xenograft tumors were recovered, frozen, sectioned, fixed and counterstained with DAPI as described in the following section. Sections were imaged on the confocal microscope to confirm aptamer retention by LN3 primary tumor xenografts.

For in vivo experiments to determine retention of Apt63 by mammary xenograft tumors, 21 NOD.CB17-Prkdcscid/J female mice (6-8 weeks old) were injected orthotopically into the mammary fat pad with  $10^6$  of MDA-MB-231 cells. When xenograft tumors reach a palpable/visual size, each mouse received single tail vein injection or 1 nmol of Alexa Fluor™ 647 labeled Apt63 and AptScr in 200  $\mu$ l PBS, 9 mice with Apt63, 9 mice with AptScr. 3 mice were injected with PBS only for control. Mice were sacrificed at 6, 24 and 48 hours post injection. Control mice were sacrificed at one time point, 48 hours post injection. Xenograft tumors were recovered, frozen, processed for histology and immunofluorescent analysis as described in the following section. Small tumor samples were separated prior to fixation for DNA extraction.

## Online Resource 2 continued (Supplemental Methods)

### Tumor tissue and FFPE human biopsy arrays fluorescent staining and analysis

Xenograft tumors were removed from sacrificed mouse, oriented in cryomold with Tissue-Tek® O.C.T. Compound (Sakura® Finetek, USA) positioned flat on dry ice, and left to freeze. Frozen tissue blocks were sectioned on a Leica Cryomicrotome, -20°C. 10 µm thick sections were attached to glass slides and kept in -20 °C until being processed for staining. For Cy3-Apt63 staining, slides with frozen sections were removed from the freezer and placed immediately into 2% paraformaldehyde in PBS and fixed for 10 min. Next, slides were washed with PBS (3 times 1 min each). To block nonspecific RNA and DNA signals, sections were incubated 30 min in 10% dextran sulfate (Sigma) in PBS. Next, sections were washed (3 times 1 min each) and incubated with 1nM of Cy3-Apt63 for 30 min in the humidity chamber. After incubation, sections were briefly washed with PBS (3 times 1 min each) and counterstained with DAPI (Sigma) at 1 µg final concentration for 5 minutes. For Alexa Fluor® 647 labeled Apt63 uptake study xenograft tumors were removed, frozen, sectioned, counterstained with DAPI (Sigma), 1 µg final concentration for 5 minutes, washed and mounted with ProLong®Gold antifade reagent (Life Technologies).

Prostate and breast tissue biopsies microarrays were purchased from US Biomax, Inc (Rockville, MD). List of microarrays used in this study summarized in Online Resource 3. Prior staining with Cy3-Apt63, sections were deparaffinized by standard histological procedure and heated in 1X Citrate Buffer, pH 6.0 (Life Technologies, USA) for 30 minutes for antigen retrieval in the microwave. Next, sections were thoroughly washed with PBS (3 times 10 min each), incubated 30 min in 10% dextran sulfate (Sigma) in PBS to block nonspecific RNA and DNA signals, and incubated with 1nM of Cy3-Apt63 in PBS or 30 min in a humidified chamber. After incubation, sections were washed with PBS (3 times 5 min each), counterstained with DAPI (Sigma), 1 µg final concentration for 5 minutes, washed and mounted with ProLong®Gold antifade reagent (Life Technologies).

For co-localization of Alexa Fluor® 647 ATP5B antibodies (ab223436, ABCAM) and Cy3-Apt63, the tissue arrays were processed for antigen retrieval as described above than stained with 1:200 diluted ATP5B antibodies for 1 hour in RT. Next, sections were thoroughly washed with PBS (3 times 10 min each) and stained with 1 nM of Cy3-Apt63, than washed, counterstained with DAPI and mounted. To confirm the specificity of Apt63 and ATP5B co-localization, staining was also performed in reverse, when sections were first stained with Cy3-Apt63, than with ATP5B antibodies, counterstained with DAPI and mounted.

Primary rabbit polyclonal EndoG antibodies (ab9647, ABCAM) were used on xenograft frozen sections to determine the localization of endonuclease G. Sections were incubated for 2 hours in RT with 1:500 dilution for primary antibodies and 1:500 for Alexa Fluor® 488 Goat anti-Rabbit secondary antibodies (A-11034, Thermo Fisher Scientific). Sections were counterstained with DAPI as described above and mounted.

Fluorescent images were obtained on a confocal microscope (Leica SP5) using 20x dry objective (Leica PL APO CS).

Online Resource 3. List of breast cancer and normal tissue biopsies. Pathology diagnosis, TNM, grade, stage, type of tumor were provided by Biomax, Inc. Apt63 score ("0" - no specific staining, "1" - yes specific staining) was assigned to each biopsy based on staining criteria listed in Methods. Total of 416 cases.

| number | Organ  | Pathology diagnosis                                      | TNM     | Grade | Stage | Type      | aptamer staining 0/1 | TMA ID number |
|--------|--------|----------------------------------------------------------|---------|-------|-------|-----------|----------------------|---------------|
| 1      | Breast | Cancer adjacent normal breast tissue                     | -       | -     | -     | NAT       | 0                    | BR723         |
| 2      | Breast | Cancer adjacent normal breast tissue                     | -       | -     | -     | NAT       | 0                    | BR723         |
| 3      | Breast | Cancer adjacent normal breast tissue                     | -       | -     | -     | NAT       | 0                    | BR723         |
| 4      | Breast | Normal breast tissue (sparse)                            | -       | -     | -     | normal    | 0                    | BR723         |
| 5      | Breast | Normal breast duct tissue                                | -       | -     | -     | normal    | 0                    | BR723         |
| 6      | Breast | Adenosis (sparse)                                        | -       | -     | -     | benign    | 0                    | BR723         |
| 7      | Breast | Adenosis                                                 | -       | -     | -     | benign    | 0                    | BR723         |
| 8      | Breast | Adenosis                                                 | -       | -     | -     | benign    | 0                    | BR723         |
| 9      | Breast | Adenosis (fibrofatty tissue)                             | -       | -     | -     | benign    | 0                    | BR723         |
| 10     | Breast | Adenosis                                                 | -       | -     | -     | benign    | 0                    | BR723         |
| 11     | Breast | Adenosis                                                 | -       | -     | -     | benign    | 1                    | BR723         |
| 12     | Breast | Adenosis                                                 | -       | -     | -     | benign    | 0                    | BR723         |
| 13     | Breast | Adenosis (fibrofatty tissue)                             | -       | -     | -     | benign    | 0                    | BR723         |
| 14     | Breast | Adenosis                                                 | -       | -     | -     | benign    | 0                    | BR723         |
| 15     | Breast | Fibroadenoma                                             | -       | -     | -     | benign    | 0                    | BR723         |
| 16     | Breast | Fibroadenoma                                             | -       | -     | -     | benign    | 0                    | BR723         |
| 17     | Breast | Fibroadenoma                                             | -       | -     | -     | benign    | 0                    | BR723         |
| 18     | Breast | Fibroadenoma                                             | -       | -     | -     | benign    | 0                    | BR723         |
| 19     | Breast | Hyperplasia of lobule                                    | -       | -     | -     | benign    | 0                    | BR723         |
| 20     | Breast | Hyperplasia of lobule                                    | -       | -     | -     | benign    | 1                    | BR723         |
| 21     | Breast | Hyperplasia of lobule                                    | -       | -     | -     | benign    | 0                    | BR723         |
| 22     | Breast | Hyperplasia of lobule                                    | -       | -     | -     | benign    | 0                    | BR723         |
| 23     | Breast | Adenosis with mild hyperplasia of ductal epithelium      | -       | -     | -     | benign    | 0                    | BR723         |
| 24     | Breast | Hyperplasia (fibrofatty tissue)                          | -       | -     | -     | benign    | 0                    | BR723         |
| 25     | Breast | Mild hyperplasia of ductal epithelium                    | -       | -     | -     | benign    | 0                    | BR723         |
| 26     | Breast | Papillary hyperplasia of ductal epithelium               | -       | -     | -     | benign    | 1                    | BR723         |
| 27     | Breast | Hyperplasia (fibrous tissue and blood vessel tissue)     | -       | -     | -     | benign    | 0                    | BR723         |
| 28     | Breast | Mild atypical hyperplasia of lobular epithelium (sparse) | -       | -     | -     | benign    | 0                    | BR723         |
| 29     | Breast | Mild atypical hyperplasia of lobular epithelium          | -       | -     | -     | benign    | 0                    | BR723         |
| 30     | Breast | Mild atypical hyperplasia of lobular epithelium (sparse) | -       | -     | -     | benign    | 0                    | BR723         |
| 31     | Breast | Mild atypical hyperplasia of ductal epithelium           | -       | -     | -     | benign    | 0                    | BR723         |
| 32     | Breast | Mild atypical hyperplasia of lobular epithelium          | -       | -     | -     | benign    | 0                    | BR723         |
| 33     | Breast | Moderate atypical hyperplasia of ductal epithelium       | -       | -     | -     | benign    | 0                    | BR723         |
| 34     | Breast | Hyperplasia (fibrofatty tissue)                          | -       | -     | -     | benign    | 0                    | BR723         |
| 35     | Breast | Mild atypical hyperplasia of lobular epithelium          | -       | -     | -     | benign    | 0                    | BR723         |
| 36     | Breast | Mild atypical hyperplasia of lobular epithelium          | -       | -     | -     | benign    | 1                    | BR723         |
| 37     | Breast | Intraductal carcinoma                                    | T1N0M0  | -     | 1     | malignant | 0                    | BR723         |
| 38     | Breast | Intraductal carcinoma                                    | TisN0M0 | -     | 0     | malignant | 0                    | BR723         |
| 39     | Breast | Intraductal carcinoma                                    | T2N0M0  | -     | 2     | malignant | 0                    | BR723         |
| 40     | Breast | Invasive ductal carcinoma                                | T2N0M0  | 1     | 2     | malignant | 0                    | BR723         |
| 41     | Breast | Invasive ductal carcinoma                                | T4cN0M0 | 2     | 3     | malignant | 1                    | BR723         |
| 42     | Breast | Invasive ductal carcinoma                                | T2N1M0  | 2     | 2     | malignant | 0                    | BR723         |
| 43     | Breast | Invasive ductal carcinoma                                | T1N0M0  | 2     | 1     | malignant | 1                    | BR723         |
| 44     | Breast | Invasive ductal carcinoma                                | T2N0M0  | 2     | 2     | malignant | 0                    | BR723         |
| 45     | Breast | Invasive ductal carcinoma (adenosis)                     | T2N0M0  | 2     | 2     | malignant | 0                    | BR723         |
| 46     | Breast | Invasive ductal carcinoma                                | T2N0M0  | -     | 2     | malignant | 1                    | BR723         |
| 47     | Breast | Invasive ductal carcinoma                                | T2N1M0  | 2     | 2     | malignant | 0                    | BR723         |
| 48     | Breast | Invasive ductal carcinoma                                | T2N0M0  | 2     | 2     | malignant | 0                    | BR723         |
| 49     | Breast | Invasive ductal carcinoma                                | T3N1M0  | 2     | 2     | malignant | 1                    | BR723         |
| 50     | Breast | Invasive ductal carcinoma (sparse)                       | T2N0M0  | -     | 2     | malignant | 0                    | BR723         |
| 51     | Breast | Invasive ductal carcinoma                                | T3N1M1  | 1--2  | 4     | malignant | 0                    | BR723         |
| 52     | Breast | Invasive ductal carcinoma                                | T2N0M0  | 2     | 2     | malignant | 1                    | BR723         |
| 53     | Breast | Invasive ductal carcinoma                                | T2N0M0  | 3     | 2     | malignant | 1                    | BR723         |
| 54     | Breast | Invasive ductal carcinoma                                | T2N0M0  | 3     | 2     | malignant | 1                    | BR723         |
| 55     | Breast | Invasive ductal carcinoma                                | T4N1M0  | 3     | 3     | malignant | 1                    | BR723         |
| 56     | Breast | Invasive ductal carcinoma                                | T2N0M0  | 3     | 2     | malignant | 0                    | BR723         |
| 57     | Breast | Invasive ductal carcinoma                                | T2N0M0  | 3     | 2     | malignant | 1                    | BR723         |
| 58     | Breast | Medullary carcinoma                                      | T2N0M0  | -     | 2     | malignant | 1                    | BR723         |

|            |                                      |         |      |   |           |   |        |
|------------|--------------------------------------|---------|------|---|-----------|---|--------|
| 59 Breast  | Medullary carcinoma                  | T1N0M0  | -    | 1 | malignant | 0 | BR723  |
| 60 Breast  | Medullary carcinoma                  | T1N0M0  | -    | 1 | malignant | 1 | BR723  |
| 61 Breast  | Mucinous carcinoma                   | T2N0M0  | -    | 2 | malignant | 0 | BR723  |
| 62 Breast  | Mucinous carcinoma                   | T1N0M0  | -    | 1 | malignant | 1 | BR723  |
| 63 Breast  | Invasive lobular carcinoma           | T2N0M0  | -    | 2 | malignant | 0 | BR723  |
| 64 Breast  | Invasive lobular carcinoma           | T4N0M0  | -    | 3 | malignant | 0 | BR723  |
| 65 Breast  | Invasive lobular carcinoma           | T4N1M0  | -    | 3 | malignant | 0 | BR723  |
| 66 Breast  | Metastatic invasive ductal carcinoma | -       | -    | - | MET.      | 1 | BR723  |
| 67 Breast  | Metastatic invasive ductal carcinoma | -       | -    | - | MET.      | 1 | BR723  |
| 68 Breast  | Metastatic invasive ductal carcinoma | -       | -    | - | MET.      | 1 | BR723  |
| 69 Breast  | Metastatic invasive ductal carcinoma | -       | -    | - | MET.      | 0 | BR723  |
| 70 Breast  | Metastatic invasive ductal carcinoma | -       | -    | - | MET.      | 1 | BR723  |
| 71 Breast  | Metastatic invasive ductal carcinoma | -       | -    | - | MET.      | 1 | BR723  |
| 72 Breast  | Invasive ductal carcinoma            | T2N0M0  | 1    | 2 | malignant | 0 | BR8017 |
| 73 Breast  | Invasive ductal carcinoma            | T3N0M0  | 1--2 | 2 | malignant | 1 | BR8017 |
| 74 Breast  | Invasive ductal carcinoma            | T2N0M0  | 1    | 2 | malignant | 0 | BR8017 |
| 75 Breast  | Invasive ductal carcinoma            | TisN0M0 | 1    | 0 | malignant | 1 | BR8017 |
| 76 Breast  | Invasive ductal carcinoma            | T2N0M0  | 2    | 2 | malignant | 1 | BR8017 |
| 77 Breast  | Invasive ductal carcinoma            | T2N0M0  | 2    | 2 | malignant | 0 | BR8017 |
| 78 Breast  | Invasive ductal carcinoma            | T2N0M0  | 2    | 2 | malignant | 1 | BR8017 |
| 79 Breast  | Invasive ductal carcinoma            | T4cN0M0 | 2    | 2 | malignant | 0 | BR8017 |
| 80 Breast  | Invasive ductal carcinoma            | T2N0M0  | 2    | 2 | malignant | 0 | BR8017 |
| 81 Breast  | Invasive ductal carcinoma            | T2N0M0  | 2    | 2 | malignant | 1 | BR8017 |
| 82 Breast  | Invasive ductal carcinoma            | T2N0M0  | 2    | 2 | malignant | 0 | BR8017 |
| 83 Breast  | Invasive ductal carcinoma            | T3N1M0  | 2    | 2 | malignant | 1 | BR8017 |
| 84 Breast  | Invasive ductal carcinoma            | T2N0M0  | 2    | 2 | malignant | 1 | BR8017 |
| 85 Breast  | Invasive ductal carcinoma            | T3N0M0  | 2    | 2 | malignant | 0 | BR8017 |
| 86 Breast  | Invasive ductal carcinoma            | T3N0M0  | 2    | 2 | malignant | 1 | BR8017 |
| 87 Breast  | Invasive ductal carcinoma            | T2N0M0  | 2    | 2 | malignant | 1 | BR8017 |
| 88 Breast  | Invasive ductal carcinoma            | T2N0M0  | 2    | 2 | malignant | 0 | BR8017 |
| 89 Breast  | Invasive ductal carcinoma            | T2N0M0  | 1    | 2 | malignant | 1 | BR8017 |
| 90 Breast  | Invasive ductal carcinoma            | T3N1M0  | 2    | 2 | malignant | 0 | BR8017 |
| 91 Breast  | Invasive ductal carcinoma            | T2N0M0  | 2    | 2 | malignant | 1 | BR8017 |
| 92 Breast  | Invasive ductal carcinoma            | T4bN0M0 | 2    | 2 | malignant | 1 | BR8017 |
| 93 Breast  | Invasive ductal carcinoma            | T2N0M0  | 2    | 2 | malignant | 1 | BR8017 |
| 94 Breast  | Invasive ductal carcinoma            | T2N0M0  | 2    | 2 | malignant | 0 | BR8017 |
| 95 Breast  | Invasive ductal carcinoma            | T2N0M0  | 2    | 2 | malignant | 0 | BR8017 |
| 96 Breast  | Invasive ductal carcinoma            | T2N0M0  | 2    | 2 | malignant | 0 | BR8017 |
| 97 Breast  | Invasive ductal carcinoma            | T3N0M0  | 2    | 2 | malignant | 1 | BR8017 |
| 98 Breast  | Invasive ductal carcinoma            | T3N0M0  | 2    | 2 | malignant | 0 | BR8017 |
| 99 Breast  | Invasive ductal carcinoma            | T2N0M0  | 2    | 2 | malignant | 1 | BR8017 |
| 100 Breast | Invasive ductal carcinoma            | T2N1M0  | 2    | 2 | malignant | 0 | BR8017 |
| 101 Breast | Invasive ductal carcinoma            | T2N1M0  | 2    | 2 | malignant | 1 | BR8017 |
| 102 Breast | Invasive ductal carcinoma            | T2N0M0  | 2    | 2 | malignant | 0 | BR8017 |
| 103 Breast | Invasive ductal carcinoma            | T3N0M0  | 2    | 2 | malignant | 0 | BR8017 |
| 104 Breast | Invasive ductal carcinoma            | T2N0M0  | 2    | 2 | malignant | 0 | BR8017 |
| 105 Breast | Invasive ductal carcinoma            | T2N0M0  | 2    | 2 | malignant | 1 | BR8017 |
| 106 Breast | Invasive ductal carcinoma            | T2N1M0  | 1    | 2 | malignant | 1 | BR8017 |
| 107 Breast | Invasive ductal carcinoma            | T2N0M0  | 2    | 2 | malignant | 1 | BR8017 |
| 108 Breast | Invasive ductal carcinoma            | T2N0M0  | 2    | 2 | malignant | 1 | BR8017 |
| 109 Breast | Invasive ductal carcinoma            | T2N0M0  | 2    | 2 | malignant | 1 | BR8017 |
| 110 Breast | Invasive ductal carcinoma            | T2N0M0  | 2    | 2 | malignant | 0 | BR8017 |
| 111 Breast | Invasive ductal carcinoma            | T2N0M0  | 1    | 2 | malignant | 1 | BR8017 |
| 112 Breast | Invasive ductal carcinoma            | T2N0M0  | 2    | 2 | malignant | 1 | BR8017 |
| 113 Breast | Invasive ductal carcinoma            | T2N0M0  | 2    | 2 | malignant | 1 | BR8017 |
| 114 Breast | Invasive ductal carcinoma            | T2N0M0  | 2    | 2 | malignant | 1 | BR8017 |
| 115 Breast | Invasive ductal carcinoma            | T2N0M0  | 2    | 2 | malignant | 0 | BR8017 |
| 116 Breast | Invasive ductal carcinoma            | T2N0M0  | 2    | 2 | malignant | 0 | BR8017 |
| 117 Breast | Invasive ductal carcinoma            | T2N0M0  | 2    | 2 | malignant | 0 | BR8017 |
| 118 Breast | Invasive ductal carcinoma            | T2N0M0  | 2    | 2 | malignant | 0 | BR8017 |



|     |            |                                                             |         |   |   |            |   |         |
|-----|------------|-------------------------------------------------------------|---------|---|---|------------|---|---------|
| 179 | Lymph node | Metastatic invasive ductal carcinoma from breast            | -       | 2 | - | Metastasis | 1 | BR8017  |
| 180 | Lymph node | Metastatic invasive ductal carcinoma from breast            | -       | 2 | - | Metastasis | 1 | BR8017  |
| 181 | Lymph node | Metastatic invasive ductal carcinoma from breast            | -       | 2 | - | Metastasis | 1 | BR8017  |
| 182 | Lymph node | Metastatic invasive ductal carcinoma from breast (fibrous - | -       | - | - | Metastasis | 1 | BR8017  |
| 183 | Lymph node | Metastatic invasive ductal carcinoma from breast            | -       | 2 | - | Metastasis | 1 | BR8017  |
| 184 | Breast     | Invasive ductal carcinoma                                   | T3N0M0  | 1 | 2 | Malignant  | 1 | BR2082b |
| 185 | Breast     | Invasive ductal carcinoma                                   | T1N0M0  | 1 | 1 | Malignant  | 0 | BR2082b |
| 186 | Breast     | Invasive ductal carcinoma                                   | T2N0M0  | 1 | 2 | Malignant  | 0 | BR2082b |
| 187 | Breast     | Invasive ductal carcinoma                                   | T2N0M0  | 2 | 2 | Malignant  | 0 | BR2082b |
| 188 | Breast     | Invasive ductal carcinoma                                   | T2N2M0  | 2 | 3 | Malignant  | 1 | BR2082b |
| 189 | Breast     | Invasive ductal carcinoma                                   | T2N0M0  | 1 | 2 | Malignant  | 0 | BR2082b |
| 190 | Breast     | Invasive ductal carcinoma                                   | T1CN0M0 | 2 | 1 | Malignant  | 1 | BR2082b |
| 191 | Breast     | Invasive ductal carcinoma                                   | T2N0M0  | 2 | 2 | Malignant  | 1 | BR2082b |
| 192 | Breast     | Invasive ductal carcinoma                                   | T4N0M0  | 2 | 3 | Malignant  | 1 | BR2082b |
| 193 | Breast     | Invasive ductal carcinoma                                   | T2N1M0  | 2 | 2 | Malignant  | 0 | BR2082b |
| 194 | Breast     | Invasive ductal carcinoma of No. 44                         | T2N1M0  | 2 | 2 | Malignant  | 0 | BR2082b |
| 195 | Breast     | Invasive ductal carcinoma                                   | T1CN0M0 | 2 | 1 | Malignant  | 0 | BR2082b |
| 196 | Breast     | Invasive ductal carcinoma                                   | T3N2M0  | 2 | 3 | Malignant  | 0 | BR2082b |
| 197 | Breast     | Invasive ductal carcinoma                                   | T2N0M0  | 2 | 2 | Malignant  | 0 | BR2082b |
| 198 | Breast     | Invasive ductal carcinoma                                   | T2N0M0  | 2 | 2 | Malignant  | 0 | BR2082b |
| 199 | Breast     | Invasive ductal carcinoma                                   | T2N0M0  | 2 | 2 | Malignant  | 1 | BR2082b |
| 200 | Breast     | Invasive ductal carcinoma                                   | T2N0M0  | 2 | 2 | Malignant  | 0 | BR2082b |
| 201 | Breast     | Invasive ductal carcinoma                                   | T2N0M0  | 2 | 2 | Malignant  | 0 | BR2082b |
| 202 | Breast     | Invasive ductal carcinoma                                   | T2N0M0  | 2 | 2 | Malignant  | 0 | BR2082b |
| 203 | Breast     | Invasive ductal carcinoma                                   | T2N1M0  | 2 | 2 | Malignant  | 1 | BR2082b |
| 204 | Breast     | Invasive ductal carcinoma                                   | T4N2M0  | 2 | 3 | Malignant  | 0 | BR2082b |
| 205 | Breast     | Invasive ductal carcinoma                                   | T4BN0M0 | 2 | 3 | Malignant  | 0 | BR2082b |
| 206 | Breast     | Invasive ductal carcinoma                                   | T2N0M0  | 2 | 2 | Malignant  | 0 | BR2082b |
| 207 | Breast     | Invasive ductal carcinoma                                   | T1N0M0  | 2 | 1 | Malignant  | 0 | BR2082b |
| 208 | Breast     | Invasive ductal carcinoma                                   | T2N0M0  | 2 | 2 | Malignant  | 0 | BR2082b |
| 209 | Breast     | Invasive ductal carcinoma                                   | T4N0M0  | 2 | 3 | Malignant  | 0 | BR2082b |
| 210 | Breast     | Invasive ductal carcinoma                                   | T2N0M0  | 2 | 2 | Malignant  | 0 | BR2082b |
| 211 | Breast     | Invasive ductal carcinoma                                   | T2N0M0  | 2 | 2 | Malignant  | 1 | BR2082b |
| 212 | Breast     | Invasive ductal carcinoma                                   | T1N0M0  | 2 | 1 | Malignant  | 1 | BR2082b |
| 213 | Breast     | Invasive ductal carcinoma                                   | T2N0M1  | 2 | 2 | Malignant  | 1 | BR2082b |
| 214 | Breast     | Invasive ductal carcinoma                                   | T2N1M0  | 2 | 2 | Malignant  | 1 | BR2082b |
| 215 | Breast     | Invasive ductal carcinoma                                   | T2N0M0  | 2 | 2 | Malignant  | 1 | BR2082b |
| 216 | Breast     | Invasive ductal carcinoma                                   | T1N0M0  | 2 | 1 | Malignant  | 1 | BR2082b |
| 217 | Breast     | Invasive ductal carcinoma                                   | T1N2M0  | 2 | 3 | Malignant  | 0 | BR2082b |
| 218 | Breast     | Invasive ductal carcinoma                                   | T2N0M0  | 2 | 2 | Malignant  | 0 | BR2082b |
| 219 | Breast     | Invasive ductal carcinoma (brease tissue)                   | T1N0M0  | - | 1 | Malignant  | 1 | BR2082b |
| 220 | Breast     | Invasive ductal carcinoma                                   | T2N0M0  | 2 | 2 | Malignant  | 1 | BR2082b |
| 221 | Breast     | Invasive ductal carcinoma                                   | T2N0M0  | 2 | 2 | Malignant  | 1 | BR2082b |
| 222 | Breast     | Invasive ductal carcinoma (fatty tissue and blood vessel)   | T2N2M0  | - | 3 | Malignant  | 0 | BR2082b |
| 223 | Breast     | Invasive ductal carcinoma                                   | T4N0M0  | 2 | 3 | Malignant  | 0 | BR2082b |
| 224 | Breast     | Invasive ductal carcinoma                                   | T2N0M0  | 2 | 2 | Malignant  | 0 | BR2082b |
| 225 | Breast     | Invasive ductal carcinoma                                   | T2N0M0  | 2 | 2 | Malignant  | 1 | BR2082b |
| 226 | Breast     | Invasive ductal carcinoma                                   | T2N0M0  | 2 | 2 | Malignant  | 1 | BR2082b |
| 227 | Breast     | Invasive ductal carcinoma                                   | T1N0M0  | 2 | 1 | Malignant  | 1 | BR2082b |
| 228 | Breast     | Invasive ductal carcinoma                                   | T1N1M0  | 2 | 2 | Malignant  | 1 | BR2082b |
| 229 | Breast     | Invasive ductal carcinoma                                   | T2N0M0  | 2 | 2 | Malignant  | 1 | BR2082b |
| 230 | Breast     | Invasive ductal carcinoma                                   | T2N0M0  | 3 | 2 | Malignant  | 1 | BR2082b |
| 231 | Breast     | Invasive ductal carcinoma                                   | T2N0M0  | 2 | 2 | Malignant  | 0 | BR2082b |
| 232 | Breast     | Invasive ductal carcinoma                                   | T2N2M0  | 2 | 3 | Malignant  | 1 | BR2082b |
| 233 | Breast     | Invasive ductal carcinoma                                   | T2N0M0  | 2 | 2 | Malignant  | 0 | BR2082b |
| 234 | Breast     | Invasive ductal carcinoma                                   | T2N0M0  | 2 | 2 | Malignant  | 0 | BR2082b |
| 235 | Breast     | Invasive ductal carcinoma                                   | T2N0M0  | 2 | 2 | Malignant  | 0 | BR2082b |
| 236 | Breast     | Invasive ductal carcinoma                                   | T2N1M0  | 2 | 2 | Malignant  | 0 | BR2082b |
| 237 | Breast     | Invasive ductal carcinoma                                   | T2N0M0  | 2 | 2 | Malignant  | 1 | BR2082b |
| 238 | Breast     | Invasive ductal carcinoma                                   | T1N0M0  | 2 | 1 | Malignant  | 1 | BR2082b |

|            |                                               |         |      |   |           |   |         |
|------------|-----------------------------------------------|---------|------|---|-----------|---|---------|
| 239 Breast | Invasive ductal carcinoma                     | T4N1M0  | 2    | 3 | Malignant | 1 | BR2082b |
| 240 Breast | Invasive ductal carcinoma                     | T2N1M0  | 2    | 2 | Malignant | 0 | BR2082b |
| 241 Breast | Invasive ductal carcinoma                     | T2N0M0  | 2    | 2 | Malignant | 0 | BR2082b |
| 242 Breast | Invasive ductal carcinoma                     | T2N0M0  | 2    | 2 | Malignant | 0 | BR2082b |
| 243 Breast | Invasive ductal carcinoma                     | T3N2M0  | 3    | 3 | Malignant | 0 | BR2082b |
| 244 Breast | Invasive ductal carcinoma                     | T2N0M0  | 2    | 2 | Malignant | 0 | BR2082b |
| 245 Breast | Invasive ductal carcinoma                     | T3N0M0  | 2    | 3 | Malignant | 0 | BR2082b |
| 246 Breast | Invasive ductal carcinoma                     | T2N1M0  | 3    | 2 | Malignant | 1 | BR2082b |
| 247 Breast | Invasive ductal carcinoma                     | T2N2M0  | 3    | 3 | Malignant | 1 | BR2082b |
| 248 Breast | Invasive ductal carcinoma                     | T2N1M0  | 3    | 2 | Malignant | 1 | BR2082b |
| 249 Breast | Invasive ductal carcinoma                     | T4N0M0  | 3    | 3 | Malignant | 0 | BR2082b |
| 250 Breast | Invasive lobular carcinoma                    | T2N0M0  | -    | 2 | Malignant | 0 | BR2082b |
| 251 Breast | Invasive lobular carcinoma                    | T2N2M0  | -    | 3 | Malignant | 0 | BR2082b |
| 252 Breast | Invasive lobular carcinoma                    | T2N1M0  | -    | 2 | Malignant | 1 | BR2082b |
| 253 Breast | Invasive lobular carcinoma (sparse)           | T2N1M0  | -    | 2 | Malignant | 0 | BR2082b |
| 254 Breast | Invasive lobular carcinoma                    | T2N0M0  | -    | 2 | Malignant | 1 | BR2082b |
| 255 Breast | Invasive lobular carcinoma                    | T2N1M0  | -    | 2 | Malignant | 1 | BR2082b |
| 256 Breast | Invasive lobular carcinoma                    | T4N0M0  | -    | 3 | Malignant | 1 | BR2082b |
| 257 Breast | Invasive lobular carcinoma                    | T4N0M0  | -    | 3 | Malignant | 0 | BR2082b |
| 258 Breast | Invasive lobular carcinoma                    | T2N0M0  | -    | 2 | Malignant | 1 | BR2082b |
| 259 Breast | Invasive lobular carcinoma                    | T2N1M0  | -    | 2 | Malignant | 1 | BR2082b |
| 260 Breast | Invasive lobular carcinoma                    | T2N0M0  | -    | 2 | Malignant | 1 | BR2082b |
| 261 Breast | Invasive lobular carcinoma                    | T4N0M0  | -    | 3 | Malignant | 1 | BR2082b |
| 262 Breast | Invasive lobular carcinoma                    | T2N1M0  | -    | 2 | Malignant | 0 | BR2082b |
| 263 Breast | Invasive lobular carcinoma                    | T2N1M0  | -    | 2 | Malignant | 0 | BR2082b |
| 264 Breast | Invasive lobular carcinoma                    | T2N1M0  | -    | 2 | Malignant | 0 | BR2082b |
| 265 Breast | Invasive lobular carcinoma (breast tissue)    | T2N0M0  | -    | 2 | Malignant | 0 | BR2082b |
| 266 Breast | Invasive lobular carcinoma (sparse)           | T2N1M0  | -    | 2 | Malignant | 0 | BR2082b |
| 267 Breast | Invasive lobular carcinoma (sparse)           | T2N1M0  | -    | 2 | Malignant | 1 | BR2082b |
| 268 Breast | Invasive lobular carcinoma                    | T2N1M0  | -    | 2 | Malignant | 0 | BR2082b |
| 269 Breast | Invasive lobular carcinoma                    | T3N1M0  | -    | 3 | Malignant | 0 | BR2082b |
| 270 Breast | Invasive lobular carcinoma                    | T2N0M0  | -    | 2 | Malignant | 1 | BR2082b |
| 271 Breast | Invasive lobular carcinoma                    | T2N1M0  | -    | 2 | Malignant | 1 | BR2082b |
| 272 Breast | Squamous cell carcinoma                       | T1N0M0  | 1--2 | 1 | Malignant | 1 | BR2082b |
| 273 Breast | Squamous cell carcinoma                       | T3N0M0  | 2    | 2 | Malignant | 0 | BR2082b |
| 274 Breast | Squamous cell carcinoma                       | T4N0M0  | 2    | 3 | Malignant | 0 | BR2082b |
| 275 Breast | Squamous cell carcinoma                       | T1N0M0  | 2    | 1 | Malignant | 0 | BR2082b |
| 276 Breast | Intraductal carcinoma                         | TisN0M0 | -    | 0 | Malignant | 0 | BR2082b |
| 277 Breast | Intraductal carcinoma (sparse)                | TisN0M0 | -    | 0 | Malignant | 1 | BR2082b |
| 278 Breast | Intraductal carcinoma                         | TisN0M0 | -    | 0 | Malignant | 1 | BR2082b |
| 279 Breast | Intraductal carcinoma                         | TisN0M0 | -    | 0 | Malignant | 1 | BR2082b |
| 280 Breast | Intraductal carcinoma                         | TisN0M0 | -    | 0 | Malignant | 1 | BR2082b |
| 281 Breast | Intraductal carcinoma                         | TisN0M0 | -    | 0 | Malignant | 1 | BR2082b |
| 282 Breast | Intraductal carcinoma                         | TisN0M0 | -    | 0 | Malignant | 1 | BR2082b |
| 283 Breast | Intraductal carcinoma                         | TisN0M0 | -    | 0 | Malignant | 1 | BR2082b |
| 284 Breast | Intraductal carcinoma (adenosis)              | TisN0M0 | -    | 0 | Malignant | 0 | BR2082b |
| 285 Breast | Intraductal carcinoma                         | TisN0M0 | -    | 0 | Malignant | 1 | BR2082b |
| 286 Breast | Intraductal carcinoma                         | T2N0M0  | -    | 2 | Malignant | 0 | BR2082b |
| 287 Breast | Intraductal carcinoma (breast tissue)         | TisN0M0 | -    | 0 | Malignant | 0 | BR2082b |
| 288 Breast | Intraductal carcinoma with early infiltration | T2N0M0  | -    | 2 | Malignant | 1 | BR2082b |
| 289 Breast | Intraductal carcinoma                         | TisN0M0 | -    | 0 | Malignant | 1 | BR2082b |
| 290 Breast | Intraductal carcinoma                         | TisN0M0 | -    | 0 | Malignant | 1 | BR2082b |
| 291 Breast | Intraductal carcinoma                         | TisN0M0 | -    | 0 | Malignant | 0 | BR2082b |
| 292 Breast | Intraductal carcinoma                         | TisN0M0 | -    | 0 | Malignant | 0 | BR2082b |
| 293 Breast | Intraductal carcinoma                         | TisN0M0 | -    | 0 | Malignant | 0 | BR2082b |
| 294 Breast | Intraductal carcinoma (duct tissue)           | TisN0M0 | -    | 0 | Malignant | 0 | BR2082b |
| 295 Breast | Intraductal carcinoma                         | T2N1M0  | -    | 2 | Malignant | 0 | BR2082b |
| 296 Breast | Intraductal carcinoma                         | TisN0M0 | -    | 0 | Malignant | 0 | BR2082b |
| 297 Breast | Intraductal carcinoma                         | T2N0M0  | -    | 2 | Malignant | 0 | BR2082b |
| 298 Breast | Lobular carcinoma in situ (adenosis)          | TisN0M0 | -    | 0 | Malignant | 0 | BR2082b |



|            |                                                               |         |   |   |             |   |         |
|------------|---------------------------------------------------------------|---------|---|---|-------------|---|---------|
| 299 Breast | Lobular carcinoma in situ                                     | TisNOM0 | - | 0 | Malignant   | 0 | BR2082b |
| 300 Breast | Lobular carcinoma in situ                                     | TisNOM0 | - | 0 | Malignant   | 0 | BR2082b |
| 301 Breast | Fibroadenoma                                                  | -       | - | - | Benign      | 1 | BR2082b |
| 302 Breast | Fibroadenoma                                                  | -       | - | - | Benign      | 1 | BR2082b |
| 303 Breast | Fibroadenoma                                                  | -       | - | - | Benign      | 1 | BR2082b |
| 304 Breast | Fibroadenoma                                                  | -       | - | - | Benign      | 0 | BR2082b |
| 305 Breast | Fibroadenoma                                                  | -       | - | - | Benign      | 0 | BR2082b |
| 306 Breast | Fibroadenoma                                                  | -       | - | - | Benign      | 0 | BR2082b |
| 307 Breast | Fibroadenoma                                                  | -       | - | - | Benign      | 0 | BR2082b |
| 308 Breast | Fibroadenoma                                                  | -       | - | - | Benign      | 0 | BR2082b |
| 309 Breast | Adenosis with hyperplasia of breast duct                      | -       | - | - | Hyperplasia | 1 | BR2082b |
| 310 Breast | Adenosis with hyperplasia of breast duct                      | -       | - | - | Hyperplasia | 0 | BR2082b |
| 311 Breast | Adenosis with hyperplasia of breast duct                      | -       | - | - | Hyperplasia | 1 | BR2082b |
| 312 Breast | Moderate hyperplasia of breast duct                           | -       | - | - | Hyperplasia | 1 | BR2082b |
| 313 Breast | Atypical hyperplasia in duct (grade II)                       | -       | - | - | Hyperplasia | 1 | BR2082b |
| 314 Breast | Adenosis with hyperplasia of breast duct                      | -       | - | - | Hyperplasia | 0 | BR2082b |
| 315 Breast | Adenosis with hyperplasia of breast duct                      | -       | - | - | Hyperplasia | 0 | BR2082b |
| 316 Breast | Hyperplasia of breast duct (hyalinosis of fibrous tissue)     | -       | - | - | Hyperplasia | 0 | BR2082b |
| 317 Breast | Adenosis with moderate hyperplasia of duct                    | -       | - | - | Hyperplasia | 0 | BR2082b |
| 318 Breast | Hyperplasia (sparse breast tissue)                            | -       | - | - | Hyperplasia | 0 | BR2082b |
| 319 Breast | Hyperplasia (adenosis)                                        | -       | - | - | Hyperplasia | 0 | BR2082b |
| 320 Breast | Hyperplasia (adenosis)                                        | -       | - | - | Hyperplasia | 1 | BR2082b |
| 321 Breast | Hyperplasia (adenosis)                                        | -       | - | - | Hyperplasia | 1 | BR2082b |
| 322 Breast | Hyperplasia (adenosis)                                        | -       | - | - | Hyperplasia | 1 | BR2082b |
| 323 Breast | Hyperplasia (fibrous tissue and blood vessel)                 | -       | - | - | Hyperplasia | 0 | BR2082b |
| 324 Breast | Hyperplasia (adenosis)                                        | -       | - | - | Hyperplasia | 0 | BR2082b |
| 325 Breast | Cancer adjacent normal breast tissue                          | -       | - | - | NAT         | 1 | BR2082b |
| 326 Breast | Cancer adjacent normal breast tissue (fatty tissue and fibr - | -       | - | - | NAT         | 0 | BR2082b |
| 327 Breast | Cancer adjacent normal breast tissue (fatty tissue and fibr - | -       | - | - | NAT         | 0 | BR2082b |
| 328 Breast | Cancer adjacent normal breast tissue (ductal ectasia)         | -       | - | - | NAT         | 1 | BR2082b |
| 329 Breast | Cancer adjacent normal breast tissue                          | -       | - | - | NAT         | 1 | BR2082b |
| 330 Breast | Cancer adjacent normal breast tissue                          | -       | - | - | NAT         | 0 | BR2082b |
| 331 Breast | Cancer adjacent normal breast tissue (fibrous tissue)         | -       | - | - | NAT         | 0 | BR2082b |
| 332 Breast | Cancer adjacent normal breast tissue                          | -       | - | - | NAT         | 0 | BR2082b |
| 333 Breast | Cancer adjacent normal breast tissue                          | -       | - | - | NAT         | 0 | BR2082b |
| 334 Breast | Cancer adjacent normal breast tissue with ductal epithelia -  | -       | - | - | Normal      | 0 | BR2082b |
| 335 Breast | Cancer adjacent normal breast tissue                          | -       | - | - | NAT         | 0 | BR2082b |
| 336 Breast | Cancer adjacent normal breast tissue (fibrous tissue and b -  | -       | - | - | NAT         | 0 | BR2082b |
| 337 Breast | Cancer adjacent normal breast tissue (fibrous tissue and b -  | -       | - | - | NAT         | 0 | BR2082b |
| 338 Breast | Cancer adjacent normal breast tissue of No. 9                 | -       | - | - | NAT         | 0 | BR2082b |
| 339 Breast | Cancer adjacent normal breast tissue                          | -       | - | - | NAT         | 0 | BR2082b |
| 340 Breast | Cancer adjacent normal breast tissue                          | -       | - | - | NAT         | 1 | BR2082b |
| 341 Breast | Breast Breast invasive ductal carcinoma                       | T2NOM0  | 1 | 2 | malignant   | 0 | BR8013  |
| 342 Breast | Breast invasive ductal carcinoma                              | T2NOM0  | 1 | 2 | malignant   | 0 | BR8013  |
| 343 Breast | Breast invasive ductal carcinoma                              | T1N1M0  | 2 | 2 | malignant   | 1 | BR8013  |
| 344 Breast | Breast invasive ductal carcinoma                              | T2NOM0  | 2 | 2 | malignant   | 1 | BR8013  |
| 345 Breast | Breast invasive ductal carcinoma                              | T1N1M0  | 2 | 2 | malignant   | 1 | BR8013  |
| 346 Breast | Breast invasive ductal carcinoma                              | T2NOM0  | 2 | 2 | malignant   | 1 | BR8013  |
| 347 Breast | Breast invasive ductal carcinoma                              | T1N1M0  | 2 | 2 | malignant   | 0 | BR8013  |
| 348 Breast | Breast invasive ductal carcinoma                              | T2NOM0  | 2 | 2 | malignant   | 0 | BR8013  |
| 349 Breast | Breast invasive ductal carcinoma (fibrofatty tissue)          | T2NOM0  | - | 2 | malignant   | 1 | BR8013  |
| 350 Breast | Breast invasive ductal carcinoma                              | T2NOM0  | 2 | 2 | malignant   | 1 | BR8013  |
| 351 Breast | Breast invasive ductal carcinoma                              | T2NOM0  | 3 | 2 | malignant   | 1 | BR8013  |
| 352 Breast | Breast invasive ductal carcinoma                              | T3N1M0  | 2 | 2 | malignant   | 0 | BR8013  |
| 353 Breast | Breast invasive ductal carcinoma                              | T2NOM0  | 2 | 2 | malignant   | 1 | BR8013  |
| 354 Breast | Breast invasive ductal carcinoma                              | T2NOM0  | 2 | 2 | malignant   | 0 | BR8013  |
| 355 Breast | Breast invasive ductal carcinoma (breast tissue)              | T2N1M0  | - | 2 | malignant   | 1 | BR8013  |
| 356 Breast | Breast invasive ductal carcinoma                              | T2N1M0  | 2 | 2 | malignant   | 0 | BR8013  |
| 357 Breast | Breast invasive ductal carcinoma                              | T2N1M0  | 2 | 2 | malignant   | 1 | BR8013  |
| 358 Breast | Breast invasive ductal carcinoma                              | T4N1M0  | 2 | 3 | malignant   | 0 | BR8013  |

|            |                                                            |        |      |   |           |   |        |
|------------|------------------------------------------------------------|--------|------|---|-----------|---|--------|
| 359 Breast | Breast invasive ductal carcinoma (hyperplasia of breast du | T2N1M0 | -    | 2 | malignant | 1 | BR8013 |
| 360 Breast | Breast invasive ductal carcinoma                           | T2N1M0 | 2    | 2 | malignant | 1 | BR8013 |
| 361 Breast | Breast invasive ductal carcinoma                           | T2N1M0 | 2    | 2 | malignant | 0 | BR8013 |
| 362 Breast | Breast invasive ductal carcinoma                           | T4N1M0 | 2    | 3 | malignant | 1 | BR8013 |
| 363 Breast | Breast invasive ductal carcinoma                           | T2N1M0 | 2    | 2 | malignant | 1 | BR8013 |
| 364 Breast | Breast invasive ductal carcinoma                           | T2N1M0 | 2    | 2 | malignant | 0 | BR8013 |
| 365 Breast | Breast invasive ductal carcinoma                           | T2N1M0 | 2    | 2 | malignant | 0 | BR8013 |
| 366 Breast | Breast invasive ductal carcinoma                           | T2N1M0 | 2    | 2 | malignant | 0 | BR8013 |
| 367 Breast | Breast invasive ductal carcinoma                           | T2N1M0 | 2    | 2 | malignant | 0 | BR8013 |
| 368 Breast | Breast invasive ductal carcinoma                           | T3N1M0 | 2    | 3 | malignant | 1 | BR8013 |
| 369 Breast | Breast invasive ductal carcinoma                           | T2N1M0 | 2    | 2 | malignant | 0 | BR8013 |
| 370 Breast | Breast invasive ductal carcinoma                           | T2N1M0 | 2    | 3 | malignant | 1 | BR8013 |
| 371 Breast | Breast invasive ductal carcinoma                           | T4N2M0 | 2    | 3 | malignant | 1 | BR8013 |
| 372 Breast | Breast invasive ductal carcinoma                           | T2N1M0 | 2    | 2 | malignant | 0 | BR8013 |
| 373 Breast | Breast invasive ductal carcinoma                           | T2N1M0 | 2    | 2 | malignant | 0 | BR8013 |
| 374 Breast | Breast invasive ductal carcinoma                           | T2N2M0 | 2    | 3 | malignant | 0 | BR8013 |
| 375 Breast | Breast invasive ductal carcinoma                           | T2N1M0 | 2    | 2 | malignant | 0 | BR8013 |
| 376 Breast | Breast invasive ductal carcinoma                           | T2N1M0 | 2    | 2 | malignant | 1 | BR8013 |
| 377 Breast | Breast invasive ductal carcinoma                           | T2N1M0 | 2    | 2 | malignant | 0 | BR8013 |
| 378 Breast | Breast invasive ductal carcinoma                           | T2N1M0 | 2    | 2 | malignant | 1 | BR8013 |
| 379 Breast | Breast invasive ductal carcinoma                           | T2N1M0 | 2    | 2 | malignant | 1 | BR8013 |
| 380 Breast | Breast invasive ductal carcinoma                           | T2N1M0 | 2    | 2 | malignant | 0 | BR8013 |
| 381 Breast | Breast invasive ductal carcinoma                           | T2N1M0 | 2    | 2 | malignant | 1 | BR8013 |
| 382 Breast | Breast invasive ductal carcinoma                           | T4N2M0 | 2    | 3 | malignant | 1 | BR8013 |
| 383 Breast | Breast invasive ductal carcinoma                           | T3N2M0 | 2    | 3 | malignant | 1 | BR8013 |
| 384 Breast | Breast invasive ductal carcinoma                           | T4N1M0 | 2    | 3 | malignant | 1 | BR8013 |
| 385 Breast | Breast invasive ductal carcinoma                           | T2N1M0 | 2    | 2 | malignant | 1 | BR8013 |
| 386 Breast | Breast invasive ductal carcinoma                           | T4N2M1 | 2    | 4 | malignant | 0 | BR8013 |
| 387 Breast | Breast invasive ductal carcinoma (breast tissue)           | T4N0M0 | -    | 3 | malignant | 1 | BR8013 |
| 388 Breast | Breast invasive ductal carcinoma (sparse)                  | T2N1M0 | -    | 2 | malignant | 0 | BR8013 |
| 389 Breast | Breast invasive ductal carcinoma                           | T2N1M0 | 1--2 | 2 | malignant | 1 | BR8013 |
| 390 Breast | Breast invasive ductal carcinoma                           | T2N1M0 | 3    | 2 | malignant | 1 | BR8013 |
| 391 Breast | Breast invasive ductal carcinoma                           | T2N1M0 | 3    | 2 | malignant | 1 | BR8013 |
| 392 Breast | Breast invasive ductal carcinoma                           | T2N2M0 | 3    | 2 | malignant | 1 | BR8013 |
| 393 Breast | Breast invasive ductal carcinoma                           | T2N1M0 | 2    | 2 | malignant | 0 | BR8013 |
| 394 Breast | Breast invasive ductal carcinoma                           | T2N2M0 | 2    | 3 | malignant | 1 | BR8013 |
| 395 Breast | Breast invasive ductal carcinoma                           | T2N1M0 | 2    | 2 | malignant | 1 | BR8013 |
| 396 Breast | Breast invasive ductal carcinoma                           | T3N1M0 | 3    | 3 | malignant | 1 | BR8013 |
| 397 Breast | Breast invasive ductal carcinoma                           | T2N1M0 | 2    | 2 | malignant | 1 | BR8013 |
| 398 Breast | Breast invasive ductal carcinoma                           | T2N1M0 | 3    | 2 | malignant | 0 | BR8013 |
| 399 Breast | Breast invasive ductal carcinoma                           | T3N1M0 | 3    | 3 | malignant | 1 | BR8013 |
| 400 Breast | Breast invasive ductal carcinoma                           | T2N1M1 | 3    | 2 | malignant | 0 | BR8013 |
| 401 Breast | Breast invasive ductal carcinoma                           | T2N1M0 | 3    | 2 | malignant | 1 | BR8013 |
| 402 Breast | Breast invasive lobular carcinoma                          | T2N1M0 | -    | 2 | malignant | 0 | BR8013 |
| 403 Breast | Breast invasive lobular carcinoma                          | T2N1M0 | -    | 2 | malignant | 0 | BR8013 |
| 404 Breast | Breast invasive lobular carcinoma                          | T3N1M0 | -    | 3 | malignant | 0 | BR8013 |
| 405 Breast | Breast invasive lobular carcinoma                          | T2N1M0 | -    | 2 | malignant | 0 | BR8013 |
| 406 Breast | Breast invasive lobular carcinoma                          | T2N1M0 | -    | 2 | malignant | 0 | BR8013 |
| 407 Breast | Normal breast tissue (fibrofatty tissue)                   | -      | -    | - | normal    | 0 | BR8013 |
| 408 Breast | Normal breast tissue                                       | -      | -    | - | normal    | 0 | BR8013 |
| 409 Breast | Normal breast tissue (breast duct tissue)                  | -      | -    | - | normal    | 0 | BR8013 |
| 410 Breast | Normal breast tissue                                       | -      | -    | - | normal    | 0 | BR8013 |
| 411 Breast | Normal breast tissue (breast duct tissue)                  | -      | -    | - | normal    | 0 | BR8013 |
| 412 Breast | Normal breast tissue                                       | -      | -    | - | normal    | 0 | BR8013 |
| 413 Breast | Normal breast tissue                                       | -      | -    | - | normal    | 0 | BR8013 |
| 414 Breast | Normal breast tissue                                       | -      | -    | - | normal    | 0 | BR8013 |
| 415 Breast | Normal breast tissue                                       | -      | -    | - | normal    | 0 | BR8013 |
| 416 Breast | Normal breast tissue (sparse)                              | -      | -    | - | normal    | 0 | BR8013 |

Online Resource 4. Aptamer #63 and #41 show high specificity to aggressive prostate LN3 cell line. LN3 (top) and Pro5 (bottom) cancer cell lines were incubated with 1nmol of representative Cy3-labeled aptamers from 5 sequenced families. Aggressive LN3 cell line show positive staining by Apt63 and 41; Pro5 cell line doesn't show positive staining. Original confocal imaging magnification: 20x

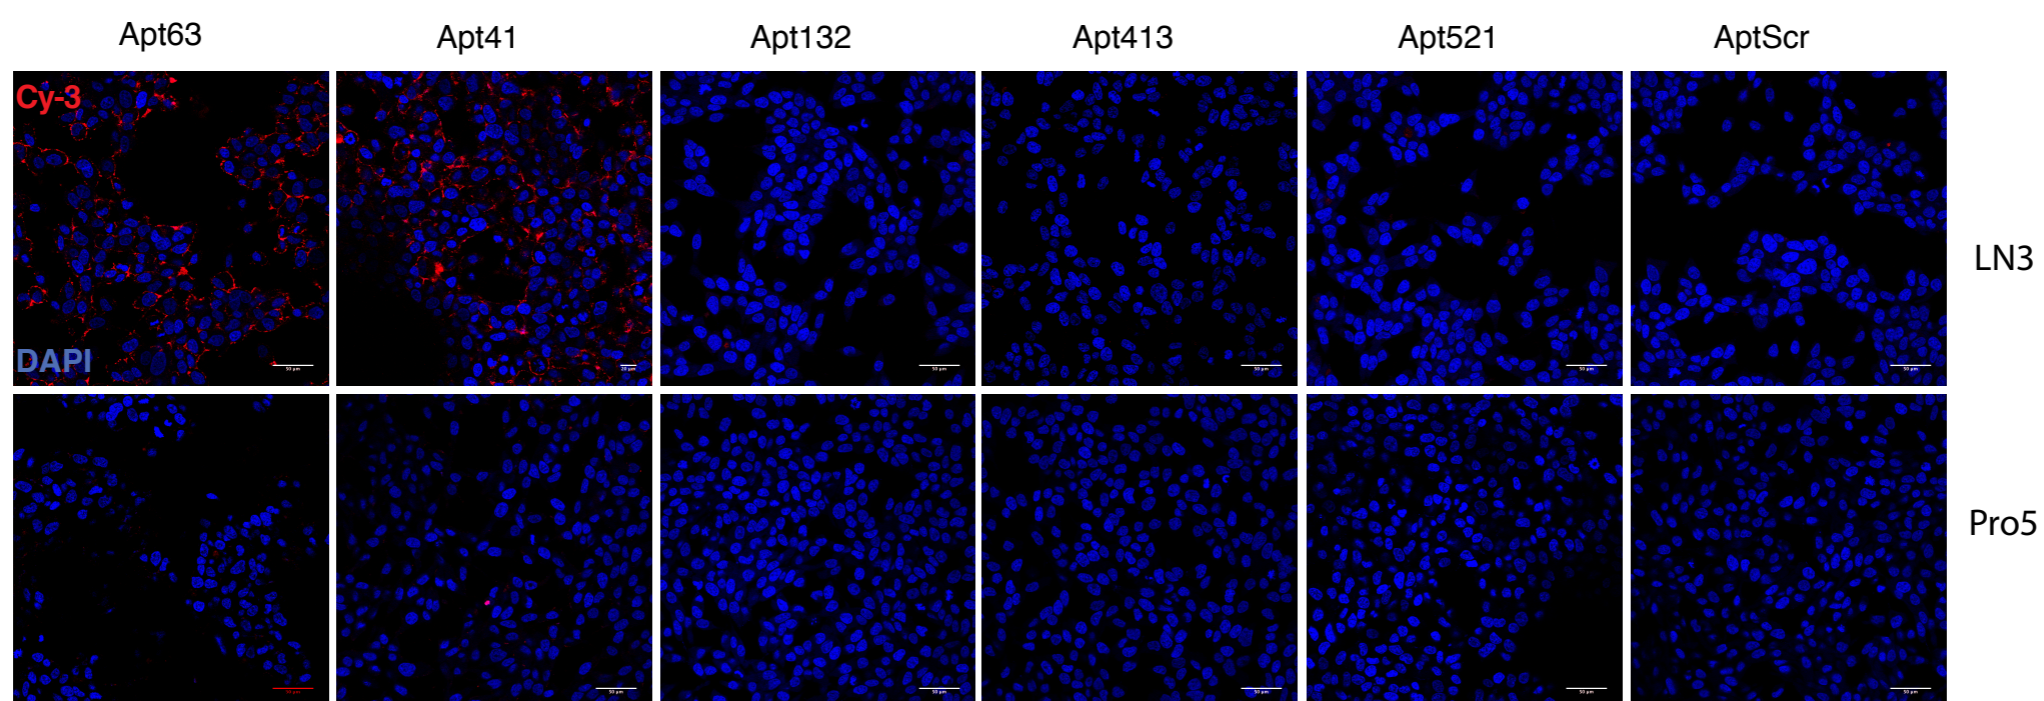

Online Resource 5. Apt63 efficiently discriminates between murine breast cancer cell lines with different metastatic potential, indicating inter-spe-cies conservation of the binding target. E0771.LMB and 4T1, highly metastatic cell lines show positive staining by Apt63; E0771 and 67 NR doesn't show positive staining. Original confocal imaging magnification: 20x

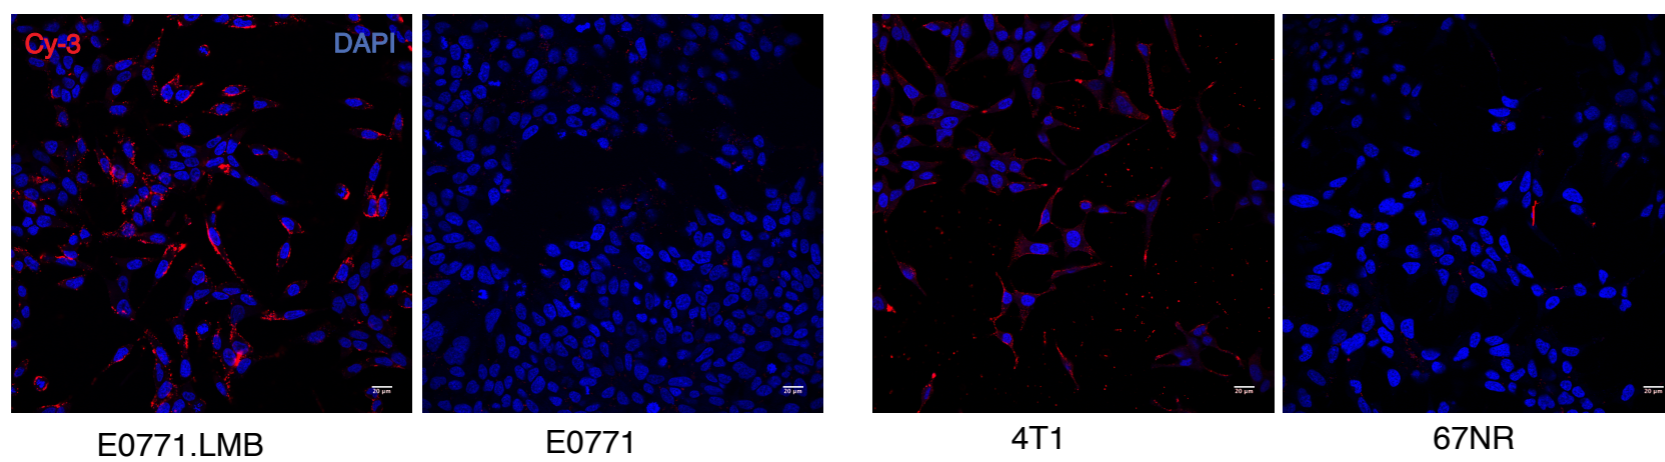

Supplement: MOESM1 [file 16666710]
